# Supplementary material for: Microstructure and Properties of Ti6Al4V Surface Processed by Continuous Wave Laser in Different Atmospheres
Source: MDPI journal article supplement (doi:10.3390/coatings14060753), 2024-06-14
Supplement: s1 [file coatings-3023166-supplementary.pdf › coatings-3023166-supplementary.pdf]

The post-indentation sites were examined by optical microscopy and shown in Figure S1. There were no cracks detected from the edges of these sites.

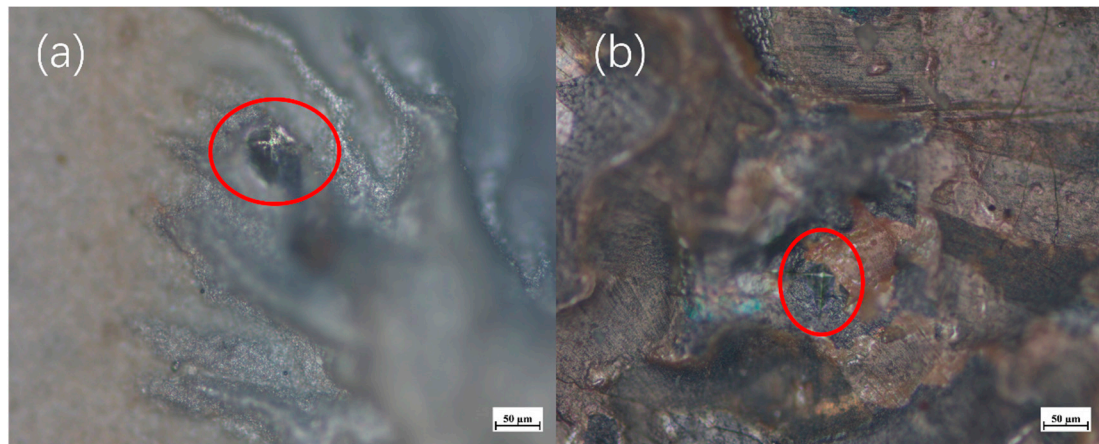

**Figure S1.** Optical microscopy images of the post-indentation sites; (a) Ti-A10; (b) Ti-O10.
